# Supplementary material for: Personalized Management of Patients with Chronic Rhinosinusitis with Nasal Polyps in Clinical Practice: A Multidisciplinary Consensus Statement
Source: MDPI journal article supplement (doi:10.3390/jpm12050846), 2022-05-23
Supplement: s1 [file s1]

## Supplementary Material

**Table S1.** Summary of statements from round one of the Delphi process and the level of agreement reached for each

| No. | Statements by topic                                                                                                                                                                               | % of replies<br>≥4 <sup>a,b</sup> | Strongly<br>disagree | Disagree | Partially<br>agree | Agree  | Strongly<br>agree |
|-----|---------------------------------------------------------------------------------------------------------------------------------------------------------------------------------------------------|-----------------------------------|----------------------|----------|--------------------|--------|-------------------|
| 1   | Nasal cytology is an effective tool to determine nasal eosinophilia in CRSwNP.                                                                                                                    | 77.5                              | 0.00%                | 0.00%    | 22.50%             | 35.00% | 42.50%            |
| 2   | Nasal cytology can be an effective surrogate for tissue eosinophilia whenever the histopathologic report is not available.                                                                        | 67.5                              | 2.50%                | 2.50%    | 27.50%             | 32.50% | 35.00%            |
| 3   | In patients with CRSwNP, smell assessment should be routinely assessed by means of UPSIT® test or Sniffin' sticks.                                                                                | 82.5                              | 0.00%                | 2.50%    | 15.00%             | 45.00% | 37.50%            |
| 4   | All patients with CRSwNP with respiratory symptoms must be evaluated to detect the presence of asthma.                                                                                            | 100.0                             | 0.00%                | 0.00%    | 0.00%              | 12.50% | 87.50%            |
| 5   | CT imaging should be performed in patients with asthma reporting nasal symptoms.                                                                                                                  | 55.0                              | 0.00%                | 15.00%   | 30.00%             | 20.00% | 35.00%            |
| 6   | In the absence of a biopsy finding, nasal cytology may be helpful in the definition of the phenotype.                                                                                             | 75.0                              | 0.00%                | 2.50%    | 22.50%             | 37.50% | 37.50%            |
| 7   | Nasal cytology with sampling on the inferior turbinate is a simple, inexpensive, non-invasive method and also applicable to outpatient settings, for the cellular phenotyping of nasal polyposis. | 80.0                              | 0.00%                | 7.50%    | 12.50%             | 32.50% | 47.50%            |
| 8   | Values >10 EOS/HPF in biopsy specimens are indicative of eosinophilic/type 2 involvement.                                                                                                         | 77.5                              | 0.00%                | 2.50%    | 20.00%             | 62.50% | 15.00%            |

|    |                                                                                                                                    |      |       |        |        |        |        |
|----|------------------------------------------------------------------------------------------------------------------------------------|------|-------|--------|--------|--------|--------|
| 9  | Eosinophil cut-off point of 250 cells/ $\mu$ L is indicative of a type 2 endotype.                                                 | 62.5 | 2.50% | 5.00%  | 30.00% | 45.00% | 17.50% |
| 10 | The detection of <i>Staphylococcus</i> endotoxin-specific IgE at nasal level is clinically useful.                                 | 50.0 | 0.00% | 10.00% | 40.00% | 37.50% | 12.50% |
| 11 | Targeting IgE is a mechanism to reduce eosinophilic inflammation in asthma and CRS.                                                | 60.0 | 0.00% | 12.50% | 27.50% | 50.00% | 10.00% |
| 12 | In CRSwNP, Clinical-Cytological Grading (CCG) is a simple and fast method to recognize the pathology's degree of severity.         | 62.5 | 5.00% | 7.50%  | 25.00% | 47.50% | 15.00% |
| 13 | In CRSwNP of moderate degree (CCG 4–6), OCS equal to 800 mg/year is considered an acceptable dose.                                 | 40.0 | 2.50% | 20.00% | 37.50% | 40.00% | 0.00%  |
| 14 | Total NPS $\geq 5$ can be considered as a “relative” parameter for the CRSwNP severity.                                            | 72.5 | 0.00% | 0.00%  | 27.50% | 65.00% | 7.50%  |
| 15 | SNOT-22 $\geq 40$ is related to the disease's severity, but the test is considered to be vulnerable because of its subjectiveness. | 47.5 | 2.50% | 7.50%  | 42.50% | 37.50% | 10.00% |
| 16 | OCS dosage $>1$ g/year is a sign of CRSwNP severity.                                                                               | 85.0 | 0.00% | 5.00%  | 10.00% | 67.50% | 17.50% |
| 17 | Smell must not be considered as the main outcome of treatment since its appearance is usually transitory and brief.                | 42.5 | 0.00% | 27.50% | 30.00% | 40.00% | 2.50%  |
| 18 | SNOT-22 can be considered a reliable outcome in response to treatment.                                                             | 90.0 | 0.00% | 2.50%  | 7.50%  | 77.50% | 12.50% |
| 19 | Total NPS reduction can be considered a reliable outcome in response to treatment.                                                 | 80.0 | 0.00% | 2.50%  | 17.50% | 62.50% | 17.50% |

|    |                                                                                                                                                            |      |       |        |        |        |        |
|----|------------------------------------------------------------------------------------------------------------------------------------------------------------|------|-------|--------|--------|--------|--------|
| 20 | Reduction in systemic prednisone dosage of ≥50% is an indirect outcome in response to biologic treatment.                                                  | 80.0 | 0.00% | 0.00%  | 20.00% | 52.50% | 27.50% |
| 21 | N-ERD patients are problematic under the treatment point of view.                                                                                          | 71.8 | 0.00% | 2.56%  | 25.64% | 48.72% | 23.08% |
| 22 | Before patients undergo a FESS surgery, it may be helpful to know their CCG and the prognostic relapse index.                                              | 85.0 | 0.00% | 7.50%  | 7.50%  | 52.50% | 32.50% |
| 23 | NPS must be adopted on a routine basis.                                                                                                                    | 97.5 | 0.00% | 0.00%  | 2.50%  | 55.00% | 42.50% |
| 24 | Up to now, SNOT-22 is the only validated available tool for the assessment of HRQoL in CRSwNP patients.                                                    | 79.5 | 0.00% | 7.69%  | 12.82% | 56.41% | 23.08% |
| 25 | SNOT-22, CT score and endoscopic score correlate.                                                                                                          | 67.5 | 0.00% | 10.00% | 22.50% | 60.00% | 7.50%  |
| 26 | A high endoscopic grading score, such as a NPS >5/8 should be added to the criteria of indications for biologic treatment in CRSwNP proposed by EPOS 2020. | 67.5 | 0.00% | 10.00% | 22.50% | 52.50% | 15.00% |
| 27 | There should always be clear evidence of type 2 inflammation to consider CRSwNP patients eligible for treatment with biologics.                            | 92.5 | 0.00% | 2.50%  | 5.00%  | 35.00% | 57.50% |
| 28 | Treatment with biologics should be considered in patients never treated by surgery only in exceptional circumstances.                                      | 30.0 | 7.50% | 35.00% | 27.50% | 17.50% | 12.50% |
| 29 | Patients with difficult-to-treat CRSwNP that have undergone multiple appropriate surgeries                                                                 | 57.5 | 0.00% | 22.50% | 20.00% | 42.50% | 15.00% |

|                                                                                                                                                        |                                                                                                                                                                                                              |      |       |        |        |        |        |
|--------------------------------------------------------------------------------------------------------------------------------------------------------|--------------------------------------------------------------------------------------------------------------------------------------------------------------------------------------------------------------|------|-------|--------|--------|--------|--------|
|                                                                                                                                                        | should be eligible for treatment with biologics<br>90.0 whatever their endoscopic or HRQoL scores.                                                                                                           |      |       |        |        |        |        |
| 30                                                                                                                                                     | Biologics should be discontinued at 6 months of<br>treatment in case of poor or no response.                                                                                                                 | 90.0 | 0.00% | 0.00%  | 10.00% | 55.00% | 35.00% |
| 31                                                                                                                                                     | The reduction of polyp size, the improvement of<br>sense of smell and the improvement of QoL are<br>criteria to define response to biologics, that<br>should be based on specific cut-off set by<br>EUFOREA. | 94.9 | 0.00% | 0.00%  | 5.13%  | 66.67% | 28.21% |
| 32                                                                                                                                                     | In case of discontinuation of a specific biologic, a<br>washout time should be always taken into<br>consideration before starting another one.                                                               | 50.0 | 0.00% | 20.00% | 30.00% | 30.00% | 20.00% |
| 33                                                                                                                                                     | The lowest effective dose of systemic CS should<br>be used in the short-term management of<br>CRSwNP.                                                                                                        | 75.0 | 0.00% | 7.50%  | 17.50% | 50.00% | 25.00% |
| 34                                                                                                                                                     | Biologics should be offered for the management<br>of comorbid CRSwNP and asthma in order to<br>reduce exposure to systemic CS.                                                                               | 95.0 | 0.00% | 0.00%  | 5.00%  | 30.00% | 65.00% |
| <i>Please rate, for each of the following, how much a<br/>trial addressing each topic would be relevant to<br/>advancements in research on CRSwNP:</i> |                                                                                                                                                                                                              |      |       |        |        |        |        |
| 35                                                                                                                                                     | Efficacy of FESS surgery simultaneous to<br>biologic treatment in severe CRSwNP patients.                                                                                                                    | 67.5 | 2.50% | 7.50%  | 22.50% | 42.50% | 25.00% |
| 36                                                                                                                                                     | Efficacy of treatment with biologics before<br>surgery as a driver to reduction of load of<br>inflammation, in patients with high nasal<br>endoscopic polyp scores.                                          | 77.5 | 0.00% | 12.50% | 10.00% | 47.50% | 30.00% |

|    |                                                                                                                                                                                     |      |       |       |        |        |        |
|----|-------------------------------------------------------------------------------------------------------------------------------------------------------------------------------------|------|-------|-------|--------|--------|--------|
| 37 | Comparison between biologics and surgery on recovery of olfaction.                                                                                                                  | 72.5 | 0.00% | 7.50% | 20.00% | 57.50% | 15.00% |
| 38 | Definition of clinical predictors of poor control of disease with standard of care (surgery plus local corticosteroids/OCS), as a driver of the decision to perform surgery or not. | 82.5 | 0.00% | 0.00% | 17.50% | 65.00% | 17.50% |
| 39 | Efficacy of FESS aimed at improving control of the disease in case of poor or moderate response to the biologics after 6 months of treatment.                                       | 65.0 | 0.00% | 5.00% | 30.00% | 52.50% | 12.50% |
| 40 | Accuracy of biomarkers (including nasal cytology) as markers of response to biologics.                                                                                              | 95.0 | 0.00% | 0.00% | 5.00%  | 35.00% | 60.00% |

Abbreviations: CCG, Clinical-Cytological Grading; CRS, chronic rhinosinusitis; CRSwNP, chronic rhinosinusitis with nasal polyps; CS, corticosteroids; CT, computed tomography; EOS/HPF, eosinophils per high-power field; ESS, endoscopic sinus surgery; FESS, functional endoscopic sinus surgery; HRQoL, health-related quality of life; IgE, immunoglobulin E; OCS, oral corticosteroids; N-ERD, non-steroidal anti-inflammatory drug–exacerbated respiratory disease; NPS, nasal polyp score; OCS, oral corticosteroids; SNOT-22, 22-item sino-nasal outcomes test.
